# Supplementary material for: Functional Characterization of the Dopaminergic Psychostimulant Sydnocarb as an Allosteric Modulator of the Human Dopamine Transporter
Source: MDPI journal article supplement (doi:10.3390/biomedicines9060634), 2021-06-02
Supplement: s1 [file s1]

## SUPPLEMENTARY INFORMATION

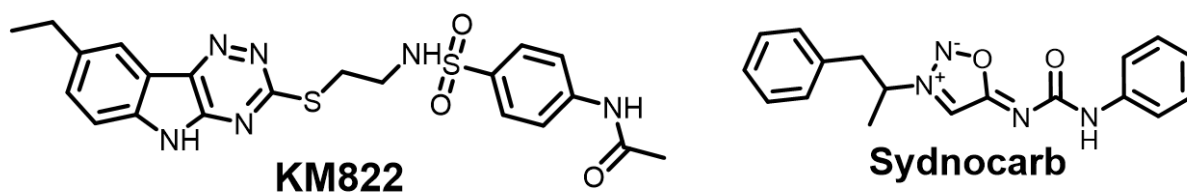

**Figure S1.** Chemical structures of KM822 and Sydnocarb.

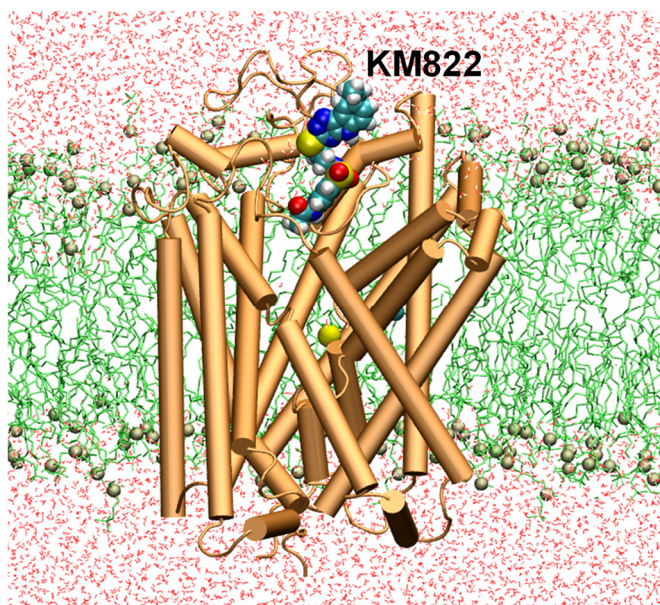

**Figure S2.** MD simulations of KM822 binding to human dopamine transporter in the outward-facing open conformer. The hDAT OFo conformer (orange) was embedded into membrane lipids (lime licorice) and solvated by 0.15M NaCl solution (not shown). A KM822 molecule (vDW format) is initially placed near the EC vestibule, at a similar site predicted in previous work [30].

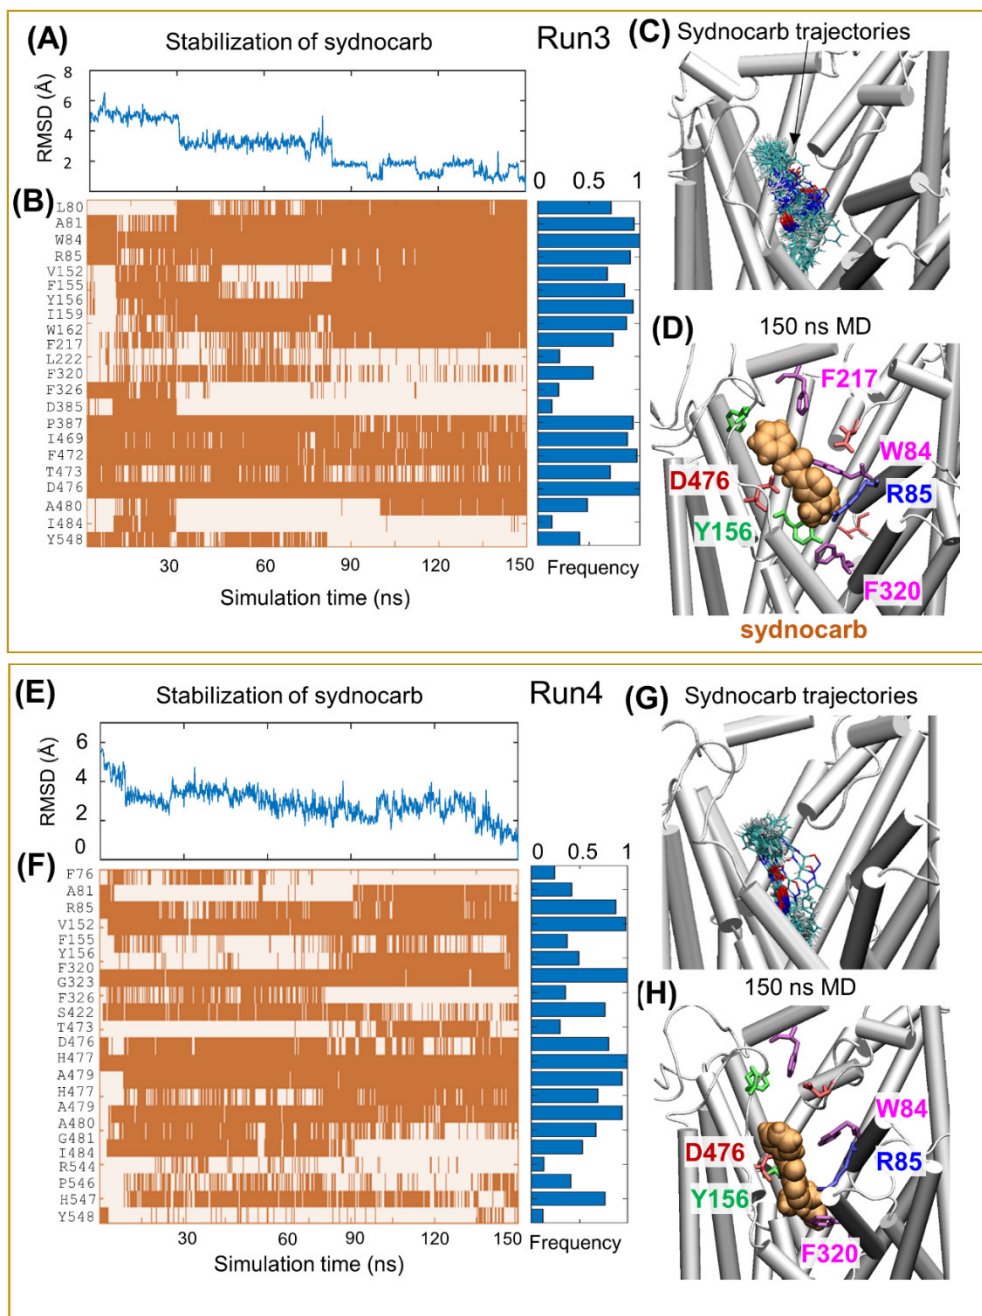

**Figure S3: MD simulations of syndnocarb in hDAT.** Top and bottom boxes display results from two independent runs Run3 and Run4. **(A)** and **(E)** Syndnocarb diffusion as a function time estimated by the RMSD of syndnocarb atoms with respect to final pose at 150 ns. **(B)** and **(F)** Time evolution of contacts ( $< 4.0\text{\AA}$  closest atom-atom distance) between DAT and syndnocarb (indicated by orange-shaded areas) with binding frequency summarized by the horizontal blue bars on the right panel. **(C)** and **(G)** syndnocarb binding poses captured in simulations with a snapshot taken every 4 ns. The ligand conformations are shown in cyan sticks. **(D)** and **(H)** MD-resolved final poses of syndnocarb (light orange vDW), observed at the end of the MD simulation Run3 and Run4. Results for MD Run1 and Run2 can be found in **Figure 3**.

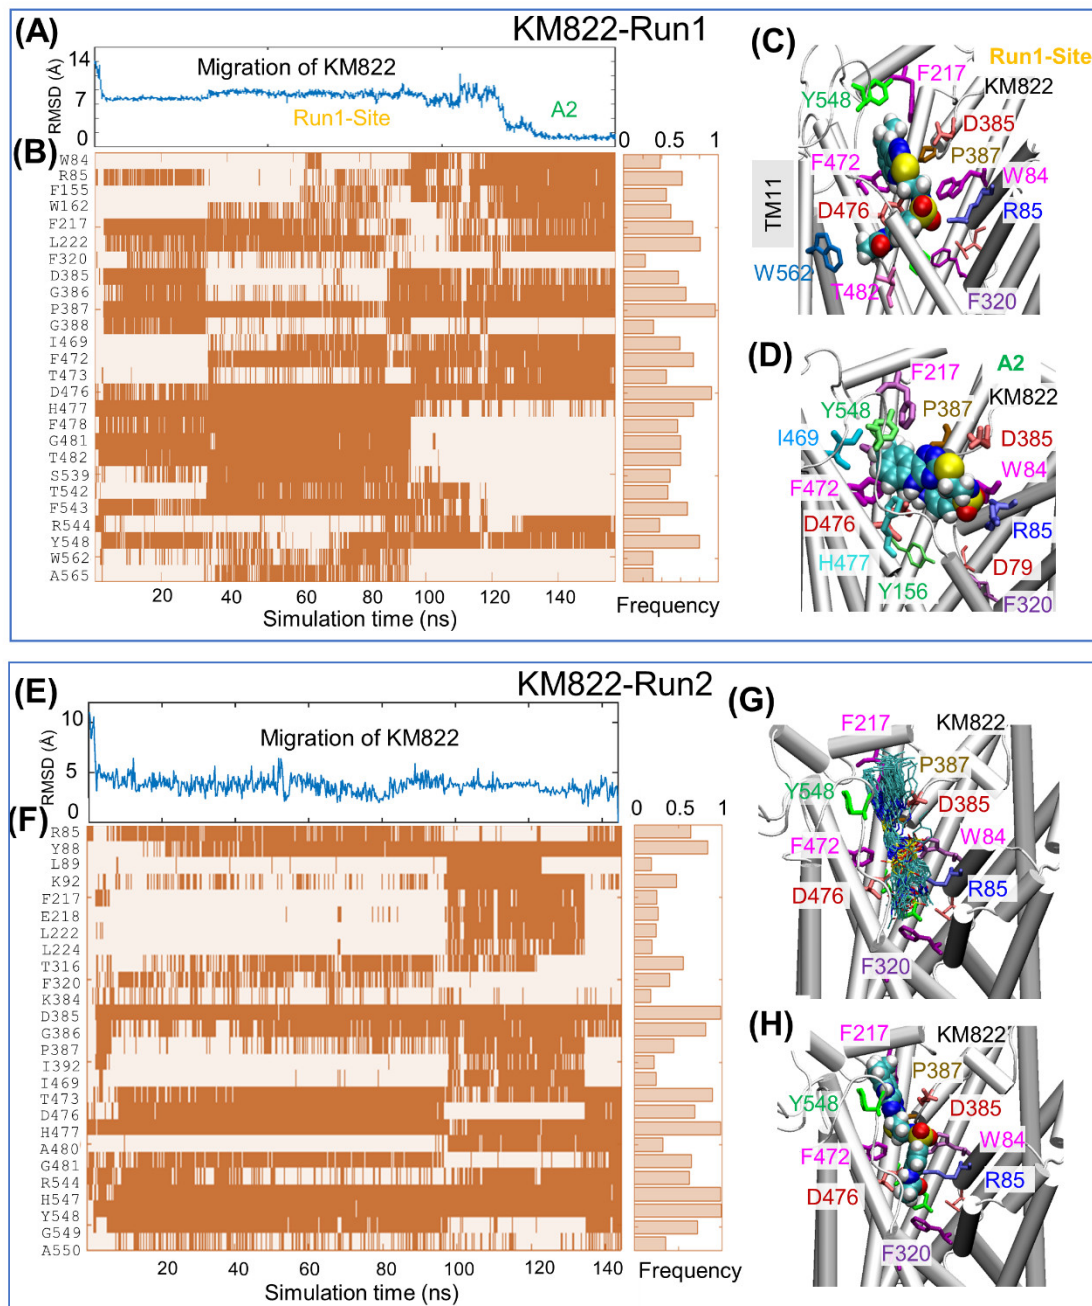

**Figure S4: MD simulations of KM822 binding to hDAT.** *Top* (Panels A-D) and *bottom* (Panels E-H) boxes display results from two independent runs KM822-Run1 and KM822-Run2. (A) and (E) KM822 diffusion as a function time estimated by the RMSD of KM822 atoms with respect to final pose at 150 ns. (B) and (F) Time evolution of contacts (< 4.0 Å closest atom-atom distance) between DAT and KM822 (indicated by orange-shaded areas), with binding frequency summarized by the horizontal light orange bars on the right panel. (C) Representative Run1-Site binding pose of KM822 (vDW), captured transitionally in KM822-Run1. (D) and (H) MD-resolved final poses of KM822 (vDW), observed at the end of KM822-Run1 and KM822-Run2. White, cyan, blue, red and yellow spheres represent hydrogen, carbon, nitrogen, oxygen, and sulfur atoms, respectively, in KM822. (G) KM822 binding poses captured in the simulation KM822-Run2 with a snapshot taken every 4 ns. The ligand conformations are shown in cyan sticks.



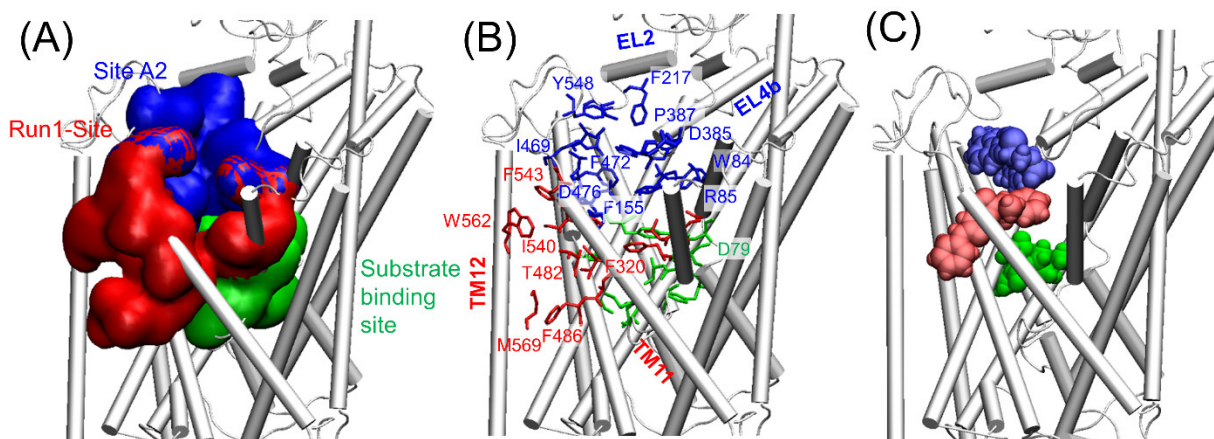

**Figure S5:** Comparison of two allosteric sites observed for the binding of KM822 or sydnocarb with the substrate-binding site. (A) Binding sites are shown in *green, red* and *blue* surface for the substrate-binding site, allosteric Site I and Site II, respectively. (B) Same binding sites are illustrated in *green, red* and *blue* sticks for residues composed of the substrate binding site, allosteric sites, A2 and Run1-Site, respectively. Run1-Site is displayed in *red* for residues commonly bound to KM822 and sydnocarb. A2 is shown in *blue* for residues commonly bound to KM822 and sydnocarb. Some residues such as W84/R85 and D476/H477 are shared between the two allosteric sites. Substrate-binding site composed residues in green are obtained from the previous simulations of cocaine binding to OFo DAT [38]. (C) Representative binding poses of ligand to the two sites shown in (B). *Green, red* and *blue* vDW balls represent cocaine, sydnocarb in the Run1\_site, and KM822 in the A2 site.
